# Supplementary material
Source: publisher figshare collection journal article supplement (https://acs.figshare.com/ndownloader/files/10325322)
Supplement: Supplementary file 1 [file 10325322]

## Supporting Information

### **Self-sufficient bioethanol production system using a lignin-derived adsorbent of fermentation inhibitors**

*Koichi Yoshioka<sup>a</sup>, Masakazu Daidai<sup>b</sup>, Yoshihiro Matsumoto<sup>a</sup>, Rie Mizuno<sup>a</sup>, Yoko Katsura<sup>b</sup>, Tatsuya Hakogi<sup>c</sup>, Hideshi Yanase<sup>c</sup> and Takashi Watanabe<sup>a\*</sup>*

<sup>a</sup>Laboratory of Biomass Conversion, Research Institute for Sustainable Humanosphere, Kyoto University, Gokasho, Uji, Kyoto 611-0011, Japan

<sup>b</sup> Japan Chemical Engineering & Machinery Co. Ltd.4-6-23 Kashima, Yodogawaku, Osaka, Osaka 332-0012, Japan

<sup>c</sup> Department of Chemistry and Biotechnology, Graduate School of Engineering, Tottori University, 4-101 Koyamacho-Minami, Tottori, Tottori 680-8552, Japan

\*Corresponding author information: E-mail: [twatanab@rsh.kyoto-u.ac.jp](mailto:twatanab@rsh.kyoto-u.ac.jp)

Number of pages: 2

Number of Figure: 1

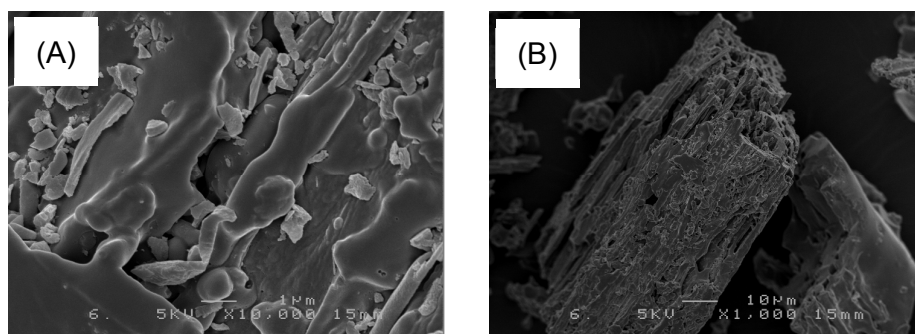

**Figure S1.** SEM images of the recycled adsorbents (Entry 9 in Table 1) prepared by thermal treatment of at 350 °C for 1 h under oxygen atmosphere with 10,000 (A) and 1,000 (B) magnifications.
